# Supplementary material
Source: PubMed Central journal article supplement (PMC3478095)
Supplement: NIHMS412370-supplement-Table.pdf [file NIHMS412370-supplement-Table.pdf]

Supplementary information S1 (table) | **Paradigms for understanding roles played by non-coding RNAs in nervous system disorders with examples**

| Disease                                                                                          | ncRNA                                 | Relationship                                                                                                                      | Ref.   |
|--------------------------------------------------------------------------------------------------|---------------------------------------|-----------------------------------------------------------------------------------------------------------------------------------|--------|
| <b>Genetic variation in ncRNA genes</b>                                                          |                                       |                                                                                                                                   |        |
| Epilepsy                                                                                         | <i>Bc1</i> lncRNA                     | <i>Bc1</i> <sup>-/-</sup> mice exhibit neuronal hyperexcitability and seizures                                                    | 1      |
| Gliomas                                                                                          | miR-26a                               | Amplification of miR-26a, targeting PTEN, is often present in gliomas                                                             | 2      |
| Gliomas                                                                                          | miR-185                               | Loss of heterozygosity and associated overexpression of miR-185, targeting DNMT1, promotes glioma formation                       | 3      |
| Major depression / insomnia                                                                      | miR-182                               | Polymorphism leads to abnormal processing of pre-miR-182 and target gene deregulation                                             | 4      |
| Mitochondrial encephalomyopathies                                                                | Mitochondrial tRNAs / rRNAs           | Heterogeneous mutations impair mitochondrial protein synthesis and respiration                                                    | 5, 6   |
| Prader-Willi syndrome                                                                            | <i>SNORD116</i> snoRNA cluster        | Microdeletion gives rise to clinical features of PWS                                                                              | 7      |
| Primitive neuroectodermal tumors                                                                 | miR-517c, -520g polycistronic cluster | Chr19q13.41 amplification results in oncogenic miRNA overexpression                                                               | 8      |
| Spinocerebellar ataxia type 8                                                                    | <i>ATXN8OS</i> lncRNA                 | Expanded repeats in lncRNA gene cause RNA-mediated toxicity                                                                       | 9, 10  |
| Stroke, gliomas, neurofibromas                                                                   | <i>ANRIL</i> lncRNA                   | Variation in the <i>ANRIL</i> gene confers disease risk                                                                           | 11-15  |
| <b>Genetic variation in disease-linked protein-coding genes impacts interactions with ncRNAs</b> |                                       |                                                                                                                                   |        |
| Alzheimer's disease and frontotemporal lobar dementia                                            | miR-659                               | Altered miR-659 binding site in <i>GRN</i> 3'-UTR is risk factor for hippocampal sclerosis in AD and TARDBP-positive FTLT         | 16, 17 |
| Tourette's syndrome                                                                              | miR-189                               | Variant miR-189 binding site in <i>SLITRK1</i> 3'-UTR is deregulation of <i>SLITRK1</i> and is associated with Tourette' syndrome | 18     |
| Parkinson's disease                                                                              | miR-433                               | Altered miR-433 binding site in <i>FGF20</i> 3'-UTR leads to deregulation and repression of $\alpha$ -synuclein                   | 19     |

| <b>Epigenetic deregulation of ncRNA genes</b>                                                         |                                        |                                                                                                         |        |
|-------------------------------------------------------------------------------------------------------|----------------------------------------|---------------------------------------------------------------------------------------------------------|--------|
| Brain tumors                                                                                          | <i>H19</i>                             | Partial loss of imprinting leads to biallelic expression                                                | 20, 21 |
| Brain tumors                                                                                          | miR-124, -137, -199b-5p                | Abnormal DNA methylation leads to deregulation                                                          | 22, 23 |
| <b>Perturbations in factors responsible for modulating ncRNA biogenesis, maturation, and function</b> |                                        |                                                                                                         |        |
| Autosomal recessive leukoencephalopathy                                                               | Pol III-dependent ncRNAs,              | Mutations in Pol III subunits impair transcription of ncRNAs                                            | 24     |
| Fragile X syndrome                                                                                    | miRNAs                                 | FMRP interacts with miRNA pathways                                                                      | 25     |
| Frontotemporal lobar dementia                                                                         | <i>NEAT1/2</i>                         | TARDBP binds high levels of <i>NEAT1/2</i> in FTLD brains                                               | 26     |
| FUS-associated pathological states                                                                    | <i>CCND1</i> promoter-derived lncRNAs  | FUS recruited by lncRNAs to <i>CCND1</i> promoter in response to DNA damage                             | 27     |
| Huntington's disease                                                                                  | miRNA isomiRs, lncRNAs                 | Deregulation of REST and consequently of ncRNAs                                                         | 28-30  |
| Macular degeneration                                                                                  | <i>Alu</i> ncRNAs                      | <i>DICER1</i> deletion leads to accumulation of toxic <i>Alu</i> ncRNAs in retinal pigmented epithelium | 31     |
| Parkinson's disease                                                                                   | miRNAs                                 | Mutations in <i>LRRK2</i> impair miRNA-mediated translational repression                                | 32     |
| <b>Genomic context links ncRNA genes to disease-causing genes and susceptibility loci</b>             |                                        |                                                                                                         |        |
| Alzheimer's disease                                                                                   | <i>BACE1</i> -antisense lncRNA         | Derived from the <i>BACE1</i> gene locus; modulates BACE1 expression and localization                   | 33     |
| Fragile X and associated tremor and ataxia syndrome                                                   | <i>FMR4</i> , <i>ASFMR</i> lncRNAs     | Overlap the <i>FMR1</i> gene locus and are deregulated in these diseases                                | 34, 35 |
| Neurodevelopmental syndromes associated with Sox2 locus                                               | <i>SOX2OT</i> , <i>SOX2DOT</i> lncRNAs | Overlap the <i>SOX2</i> gene locus                                                                      | 36     |
| Non-syndromic mental retardation                                                                      | endo-siRNAs                            | Derived from and implicated in regulating synaptic gene loci including <i>SYNGAP1</i>                   | 37     |
| Schizophrenia, bipolar disorder, major depression, autism                                             | <i>DISC2</i> lncRNA                    | Derived from and implicated in regulating <i>DISC1</i> locus                                            | 38     |
| Spinocerebellar ataxia type 7                                                                         | <i>SCAANT1</i> lncRNA                  | Transcribed antisense to and implicated in regulating <i>ATXN7</i>                                      | 39     |

| <b>ncRNAs differentially expressed in disease-related central and peripheral tissues</b> |                                                         |                                                                                                                       |        |
|------------------------------------------------------------------------------------------|---------------------------------------------------------|-----------------------------------------------------------------------------------------------------------------------|--------|
| Amyotrophic lateral sclerosis                                                            | miR-206                                                 | Upregulated in mouse models of ALS and implicated in slowing disease progression and enhancing regenerative responses | 40     |
| Brain tumors                                                                             | <i>Alu</i> / L1 retro-transposon-derived ncRNAs, miRNAs | Tumor cells release exosomes containing ncRNAs potentially promoting angiogenesis, local invasion, and metastasis     | 41, 42 |
| Cerebral ischemia                                                                        | piRNAs                                                  | piRNAs implicated in regulating LINE retrotransposons are differentially expressed in ischemic mouse brain            | 43     |
| Down syndrome                                                                            | snoRNAs, lncRNAs                                        | Deregulated in human endothelial progenitor cells isolated from blood                                                 | 44     |
| Rett syndrome                                                                            | L1 retrotransposon-derived ncRNAs                       | Patients with MECP2 mutations have increased susceptibility to L1 retrotransposition                                  | 45     |

AD, Alzheimer's disease; ALS, amyotrophic lateral sclerosis; AS, Angelman syndrome; ATXN7, ataxin 7; BACE1,  $\beta$ -site APP-cleaving enzyme 1; CCND1, cyclin D1; DISC1, disrupted in schizophrenia 1; DNMT1, DNA methyltransferase 1; FMR1, fragile X mental retardation 1; FMRP, fragile X mental retardation protein; FTL, frontotemporal lobar dementia; FUS, fused in sarcoma; GRN, granulin; HD, Huntington's disease; LRRK2, leucine-rich repeat kinase 2; lncRNA, long non-coding RNA; MECP2, methyl CpG binding protein 2; miRNA, microRNA; ncRNA, non-coding RNA; PD, Parkinson's disease; piRNA, PIWI-interacting RNA; PTEN, phosphatase and tensin homolog; PWS, Prader-Willi syndrome; RNA Pol III, RNA polymerase III; SCA8, spinocerebellar ataxia type 8; SLITRK1, Slit and Trk-like; SOX2, SRY (sex determining region Y)-box 2; SYNGAP1, synaptic Ras GTPase activating protein 1; TARDBP, TAR DNA binding protein; XLMR, X-linked mental retardation.

## Supplementary References

1. Zhong, J. et al. BC1 regulation of metabotropic glutamate receptor-mediated neuronal excitability. *J Neurosci* **29**, 9977-86 (2009).
2. Huse, J.T. et al. The PTEN-regulating microRNA miR-26a is amplified in high-grade glioma and facilitates gliomagenesis in vivo. *Genes and Development* **23**, 1327-37 (2009).
3. Zhang, Z. et al. MiR-185 targets the DNA methyltransferases 1 and regulates global DNA methylation in human glioma. *Molecular Cancer* **10**, 124 (2011).
4. Saus, E. et al. Genetic variants and abnormal processing of pre-miR-182, a circadian clock modulator, in major depression patients with late insomnia. *Human Molecular Genetics* **19**, 4017-25 (2010).
5. Yarham, J.W., Elson, J.L., Blakely, E.L., McFarland, R. & Taylor, R.W. Mitochondrial tRNA mutations and disease. *Wiley Interdiscip Rev RNA* **1**, 304-24 (2010).
6. Rotig, A. Human diseases with impaired mitochondrial protein synthesis. *Biochimica et Biophysica Acta* **1807**, 1198-205 (2011).
7. Sahoo, T. et al. Prader-Willi phenotype caused by paternal deficiency for the HBII-85 C/D box small nucleolar RNA cluster. *Nature Genetics* **40**, 719-21 (2008).
8. Li, M. et al. Frequent amplification of a chr19q13.41 microRNA polycistron in aggressive primitive neuroectodermal brain tumors. *Cancer Cell* **16**, 533-46 (2009).
9. Moseley, M.L. et al. Bidirectional expression of CUG and CAG expansion transcripts and intranuclear polyglutamine inclusions in spinocerebellar ataxia type 8. *Nat Genet* **38**, 758-69 (2006).
10. Daughters, R.S. et al. RNA gain-of-function in spinocerebellar ataxia type 8. *PLoS Genet* **5**, e1000600 (2009).
11. Pasmant, E., Sabbagh, A., Vidaud, M. & Bieche, I. ANRIL, a long, noncoding RNA, is an unexpected major hotspot in GWAS. *FASEB Journal* **25**, 444-8 (2011).
12. Zhang, W. et al. Variants on Chromosome 9p21.3 Correlated With ANRIL Expression Contribute to Stroke Risk and Recurrence in a Large Prospective Stroke Population. *Stroke* (2011).
13. Pasmant, E. et al. Role of Noncoding RNA ANRIL in Genesis of Plexiform Neurofibromas in Neurofibromatosis Type 1. *Journal of the National Cancer Institute* **103**, 1713-1722 (2011).
14. Burd, C.E. et al. Expression of linear and novel circular forms of an INK4/ARF-associated non-coding RNA correlates with atherosclerosis risk. *PLoS Genetics* **6**, e1001233 (2010).
15. Cunnington, M.S., Santibanez Koref, M., Mayosi, B.M., Burn, J. & Keavney, B. Chromosome 9p21 SNPs Associated with Multiple Disease Phenotypes Correlate with ANRIL Expression. *PLoS Genetics* **6**, e1000899 (2010).
16. Rademakers, R. et al. Common variation in the miR-659 binding-site of GRN is a major risk factor for TDP43-positive frontotemporal dementia. *Human Molecular Genetics* **17**, 3631-42 (2008).
17. Dickson, D.W., Baker, M. & Rademakers, R. Common variant in GRN is a genetic risk factor for hippocampal sclerosis in the elderly. *Neuro-Degenerative Diseases* **7**, 170-4 (2010).
18. Abelson, J.F. et al. Sequence variants in SLITRK1 are associated with Tourette's syndrome. *Science* **310**, 317-20 (2005).
19. Wang, G. et al. Variation in the miRNA-433 binding site of FGF20 confers risk for Parkinson disease by overexpression of alpha-synuclein. *American Journal of Human Genetics* **82**, 283-9 (2008).
20. Albrecht, S. et al. Variable imprinting of H19 and IGF2 in fetal cerebellum and medulloblastoma. *J Neuropathol Exp Neurol* **55**, 1270-6 (1996).
21. Muller, S., Zirkel, D., Westphal, M. & Zunkeller, W. Genomic imprinting of IGF2 and H19 in human meningiomas. *Eur J Cancer* **36**, 651-5 (2000).
22. Silber, J. et al. miR-124 and miR-137 inhibit proliferation of glioblastoma multiforme cells and induce differentiation of brain tumor stem cells. *BMC Medicine* **6**, 14 (2008).
23. Garzia, L. et al. MicroRNA-199b-5p impairs cancer stem cells through negative regulation of HES1 in medulloblastoma. *PLoS ONE* **4**, e4998 (2009).

24. Saitsu, H. et al. Mutations in POLR3A and POLR3B Encoding RNA Polymerase III Subunits Cause an Autosomal-Recessive Hypomyelinating Leukoencephalopathy. *American Journal of Human Genetics* **89**, 644-51 (2011).
25. Jin, P. et al. Biochemical and genetic interaction between the fragile X mental retardation protein and the microRNA pathway. *Nature Neuroscience* **7**, 113-7 (2004).
26. Tollervey, J.R. et al. Characterizing the RNA targets and position-dependent splicing regulation by TDP-43. *Nature Neuroscience* **14**, 452-8 (2011).
27. Wang, X. et al. Induced ncRNAs allosterically modify RNA-binding proteins in cis to inhibit transcription. *Nature* **454**, 126-30 (2008).
28. Packer, A.N., Xing, Y., Harper, S.Q., Jones, L. & Davidson, B.L. The bifunctional microRNA miR-9/miR-9\* regulates REST and CoREST and is downregulated in Huntington's disease. *J Neurosci* **28**, 14341-6 (2008).
29. Marti, E. et al. A myriad of miRNA variants in control and Huntington's disease brain regions detected by massively parallel sequencing. *Nucleic Acids Research* (2010).
30. Johnson, R. et al. The Human Accelerated Region 1 noncoding RNA is repressed by REST in Huntington's disease. *Physiological Genomics* (2010).
31. Kaneko, H. et al. DICER1 deficit induces Alu RNA toxicity in age-related macular degeneration. *Nature* **471**, 325-30 (2011).
32. Gehrke, S., Imai, Y., Sokol, N. & Lu, B. Pathogenic LRRK2 negatively regulates microRNA-mediated translational repression. *Nature* **466**, 637-41 (2010).
33. Faghihi, M.A. et al. Expression of a noncoding RNA is elevated in Alzheimer's disease and drives rapid feed-forward regulation of beta-secretase. *Nat Med* **14**, 723-30 (2008).
34. Khalil, A.M., Faghihi, M.A., Modarresi, F., Brothers, S.P. & Wahlestedt, C. A novel RNA transcript with antiapoptotic function is silenced in fragile X syndrome. *PLoS One* **3**, e1486 (2008).
35. Ladd, P.D. et al. An antisense transcript spanning the CGG repeat region of FMR1 is upregulated in premutation carriers but silenced in full mutation individuals. *Hum Mol Genet* **16**, 3174-87 (2007).
36. Amaral, P.P. et al. Complex architecture and regulated expression of the Sox2ot locus during vertebrate development. *RNA* **15**, 2013-27 (2009).
37. Smalheiser, N.R., Lugli, G., Thimmapuram, J., Cook, E.H. & Larson, J. Endogenous siRNAs and noncoding RNA-derived small RNAs are expressed in adult mouse hippocampus and are up-regulated in olfactory discrimination training. *RNA* **17**, 166-81 (2011).
38. Brandon, N.J. & Sawa, A. Linking neurodevelopmental and synaptic theories of mental illness through DISC1. *Nature Reviews. Neuroscience* **12**, 707-22 (2011).
39. Sopher, B.L. et al. CTCF regulates ataxin-7 expression through promotion of a convergently transcribed, antisense noncoding RNA. *Neuron* **70**, 1071-84 (2011).
40. Williams, A.H. et al. MicroRNA-206 delays ALS progression and promotes regeneration of neuromuscular synapses in mice. *Science* **326**, 1549-54 (2009).
41. Balaj, L. et al. Tumour microvesicles contain retrotransposon elements and amplified oncogene sequences. *Nat Commun* **2**, 180 (2011).
42. Skog, J. et al. Glioblastoma microvesicles transport RNA and proteins that promote tumour growth and provide diagnostic biomarkers. *Nat Cell Biol* **10**, 1470-6 (2008).
43. Dharap, A., Nakka, V.P. & Vemuganti, R. Altered expression of PIWI RNA in the rat brain after transient focal ischemia. *Stroke* **42**, 1105-9 (2011).
44. Costa, V. et al. Massive-scale RNA-Seq analysis of non ribosomal transcriptome in human trisomy 21. *PLoS ONE* **6**, e18493 (2011).
45. Muotri, A.R. et al. L1 retrotransposition in neurons is modulated by MeCP2. *Nature* **468**, 443-6 (2010).
